# Supplementary material for: High-efficiency CRISPR/Cas9 multiplex gene editing using the glycine tRNA-processing system-based strategy in maize
Source: PubMed Central journal article supplement (PMC4982333; doi:10.1186/s12896-016-0289-2), 2016-08-11
Supplement: 12896_2016_289_MOESM1_ESM.pdf [file 12896_2016_289_MOESM1_ESM.pdf]

**Table S1, Primers used in the experiments.**

| <b>Usage</b>               | <b>Name</b>   | <b>Sequence</b>               |
|----------------------------|---------------|-------------------------------|
| <b>Vector construction</b> | <b>U6-P-5</b> | 5'-AAGTCGTAAAATAGTGGTGTC-3'   |
|                            | <b>U6-P-3</b> | 5'-AATTCGGTGCTTGCGGCTCG-3'    |
|                            | <b>U6-T-5</b> | 5'-GCGGATTCGCACATATGCCC-3'    |
|                            | <b>U6-T-3</b> | 5'-GCGAGGGCTAAATCGTTAAG-3'    |
| <b>Genotyping</b>          | <b>BAR-5</b>  | 5'-GAAGTCCAGCTGCCAGAAAC-3'    |
|                            | <b>BAR-3</b>  | 5'-GCACCATCGTCAACCACTAC-3'    |
|                            | <b>MADS-5</b> | 5'-TTATGTTGCCTTGGTATTG-3'     |
|                            | <b>MADS-3</b> | 5'-TGCCGTCATCCATCTGTAA-3'     |
|                            | <b>MYBR-5</b> | 5'-CACACAGAATGGCATCGCCC-3'    |
|                            | <b>MYBR-3</b> | 5'-GACAGAAGAGTGTTCTGAAGGCG-3' |
|                            | <b>AP2-5</b>  | 5'-GTATGTCATGCACAACACCTTCT-3' |
|                            | <b>AP2-3</b>  | 5'-TGGCGGTGAGACATTAGGAAG-3'   |
|                            | <b>RPL-5</b>  | 5'-GTCGTTAACCCCGTCGATCC-3'    |
|                            | <b>RPL-3</b>  | 5'-CGGACAGTGCCTCCTGAC-3'      |
|                            | <b>PPR-5</b>  | 5'-ACAGATGCGATTGTGACTTGC-3'   |
|                            | <b>PPR-3</b>  | 5'-TCCTGTCATCAGGAACCAAC-3'    |
|                            | <b>Lnc-5</b>  | 5'-CGGGATCTCCACCTCTCTC-3'     |
|                            | <b>Lnc-3</b>  | 5'-TCTCTCTGGATTGCGCCGAC-3'    |
